# Supplementary material for: Effects of pH, Chloride, and Temperature on Copper Corrosion in an Aerobic Deep Geological Repository through Regression and Simulation Analysis
Source: Research Square preprint supplement (doi:10.21203/rs.3.rs-5820453/v1), 2025-01-20
Supplement: Supplementary file 1 [file 0cc5a531369034514238d671.docx]

**Effects of pH, Chloride, and Temperature on Copper Corrosion in an Aerobic Deep Geological Repository through Regression and Simulation Analysis**

Yun-Ho Leea, †, Yong-Won Kima, †, Jung-Min Lima, Un-Su Kanga, Jung-Gu Kima,*

a School of Advanced Materials Science and Engineering, Sungkyunkwan University, 300 Chunchun-Dong, Jangan-Gu, Suwon 440-746, Republic of Korea

† Bothauthors contributed equally in this work

* Corresponding author. Tel.: + 82 31 290 7360; Fax: +82 31 290 7410; e-mail: [kimjg@skku.edu](mailto:kimjg@skku.edu), ORCID iD: [https://orcid.org/0000-0001-8809-2322](https://mc04.manuscriptcentral.com/jes-ecs)

**ABSTRACT**

The corrosion behavior of copper in aerobic deep geological repository (DGR) environment was investigated with respect to environmental factors (pH, chloride, and temperature) using electrochemical tests, surface analyses, response surface methodology (RSM), and corrosion simulation. A regression model describing the relationships between environmental factors and copper corrosion rate was developed using RSM. The corrosion rate of copper increased with increasing temperature and chloride ion concentration. Among the environmental factors, temperature had the most significant effect on the copper corrosion rate, while pH had little effect. This is attributed to chloride ions being the main reactive species in copper corrosion, with diffusion of reactive species and reaction rates increasing with temperature. The RSM results were consistent with the initial stage results of the corrosion simulation for the DGR environment. However, as time progressed, the corrosion simulation results indicated that only the effect of temperature was significant on the copper corrosion rate. This is due to the depletion of reactive species on the copper surface caused by their slow diffusion in the DGR environment. At this stage, the depletion of the oxygen as the oxidizing agent has the most significant effect. In conclusion, the RSM results effectively predict the corrosion rate of copper based on the environmental factors in the early stage of the DGR environment. However, the corrosion simulation revealed that the influence of environmental factors on the copper corrosion rate changes with immersion time. This study provides valuable insights into predicting copper corrosion in aerobic DGR environment.

Keywords: copper, corrosion, deep geological repository, response surface methodology, simulation

**Table S1.** ANOVA for the initial regression model (related Eq. (22)).

| **Regression model :** | | | | | | | |
| --- | --- | --- | --- | --- | --- | --- | --- |
| **R2 : 98.46%** | | **R2 (adj.) : 95.70%** | | | **R2 (pred.) : 76.13%** | | |
| **Source** | **Degree of freedom** | | **Adj. sum of square** | **Adj. mean square** | | **F value** | **p-value** |
| **Model** | **9** | | **7.20629** | **0.8007** | | **35.59** | **0.001** |
| **Linear** | **3** | | **6.65216** | **2.21739** | | **98.56** | **0** |
| pH | 1 | | 0.008 | 0.008 | | 0.36 | 0.577 |
| T | 1 | | 5.05461 | 5.05461 | | 224.67 | 0 |
| log[Cl–] | 1 | | 1.58954 | 1.58954 | | 70.65 | 0 |
| **Square** | **3** | | **0.53523** | **0.17841** | | **7.93** | **0.024** |
| pH2 | 1 | | 0.41571 | 0.41571 | | 18.48 | 0.008 |
| T2 | 1 | | 0.15372 | 0.15372 | | 6.83 | 0.047 |
| (log[Cl–])2 | 1 | | 0.00124 | 0.00124 | | 0.05 | 0.824 |
| **Interaction** | **3** | | **0.01891** | **0.0063** | | **0.28** | **0.838** |
| pH·T | 1 | | 0.0054 | 0.0054 | | 0.24 | 0.645 |
| pH·log[Cl–] | 1 | | 0.00504 | 0.00504 | | 0.22 | 0.656 |
| T·log[Cl–] | 1 | | 0.00846 | 0.00846 | | 0.38 | 0.566 |
| **Residual** | **5** | | **0.11249** | **0.0225** | |  |  |
| **Lack of fit** | **3** | | **0.10863** | **0.03621** | | **18.8** | **0.051** |
| Pure error | 2 | | 0.00385 | 0.00193 | |  |  |
| **Total** | **14** | | **7.31878** |  | |  |  |

The red terms are insiginificant terms
